# Supplementary material
Source: publisher figshare collection journal article supplement (https://frontiersin.figshare.com/ndownloader/files/24632453)
Supplement: Supplementary file 1 [file 24632453]

**Supplement B** - Summary list of sampling activities from October 2015 – February 2017

| **Sampling event** | **Water samples** | **Sediment samples** | **Biofilm samples** |
| --- | --- | --- | --- |
| **October 2015** | Site 1: Full depth profile | N/A | LBIS 1: Biofilm sample |
| **May 2016** | Site 1: Full depth profile  Sites 2, 4, 5, 7  LBIS 1 & 3 | Sites 1 – 7 | LBIS 1 |
| **October 2016** | Site 1: Full depth profile | N/A | N/A |
| **February 2017** | Site 1: Full depth profile  Sites 2, 4, 7  LBIS 1 – 9 | N/A | LBIS 1, 6, 10 |
